# Supplementary material for: Patient education materials to implement choosing wisely recommendations for internal medicine at the emergency department
Source: PubMed Central journal article supplement (PMC7871247; doi:10.1136/bmjoq-2020-000971), 2021-02-04
Supplement: bmjoq-2020-000971supp004.pdf [file bmjoq-2020-000971supp004.pdf]

**S4 Figure. Result Choosing Wisely recommendation 1 per month.**

(1) Do not place an indwelling urinary catheter in non-critically ill patients who can void

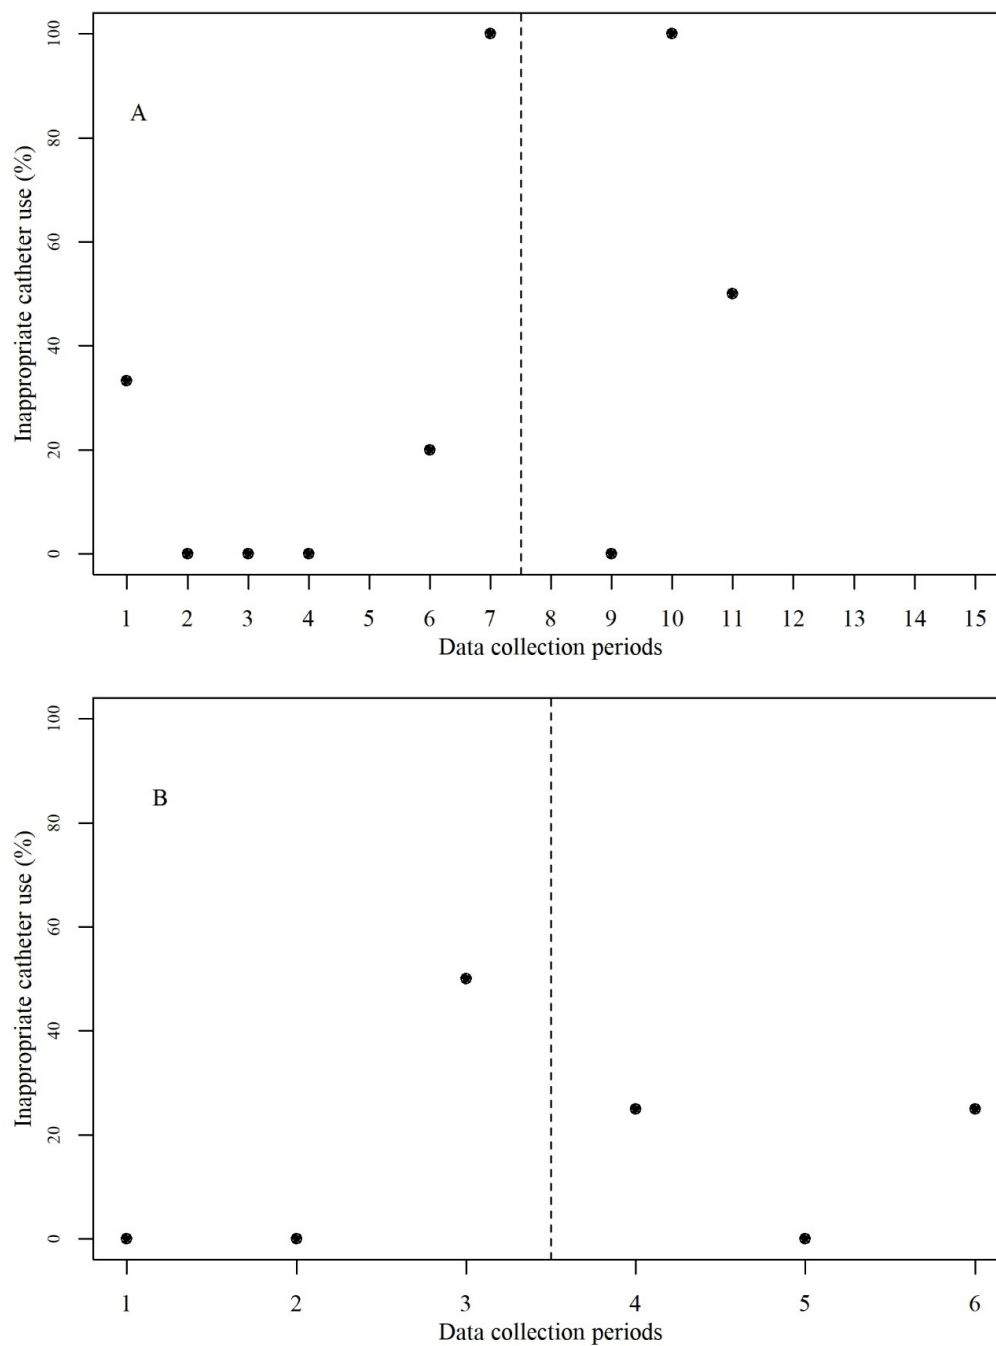

A=University hospital 1. B=University hospital 2.
