# Supplementary material for: Patient education materials to implement choosing wisely recommendations for internal medicine at the emergency department
Source: PubMed Central journal article supplement (PMC7871247; doi:10.1136/bmjoq-2020-000971), 2021-02-04
Supplement: bmjoq-2020-000971supp005.pdf [file bmjoq-2020-000971supp005.pdf]

**S5 Figure. Result Choosing Wisely recommendation 3 per month.**

(3) Discuss whether treatment limitations are needed when talking to patients about treatment options

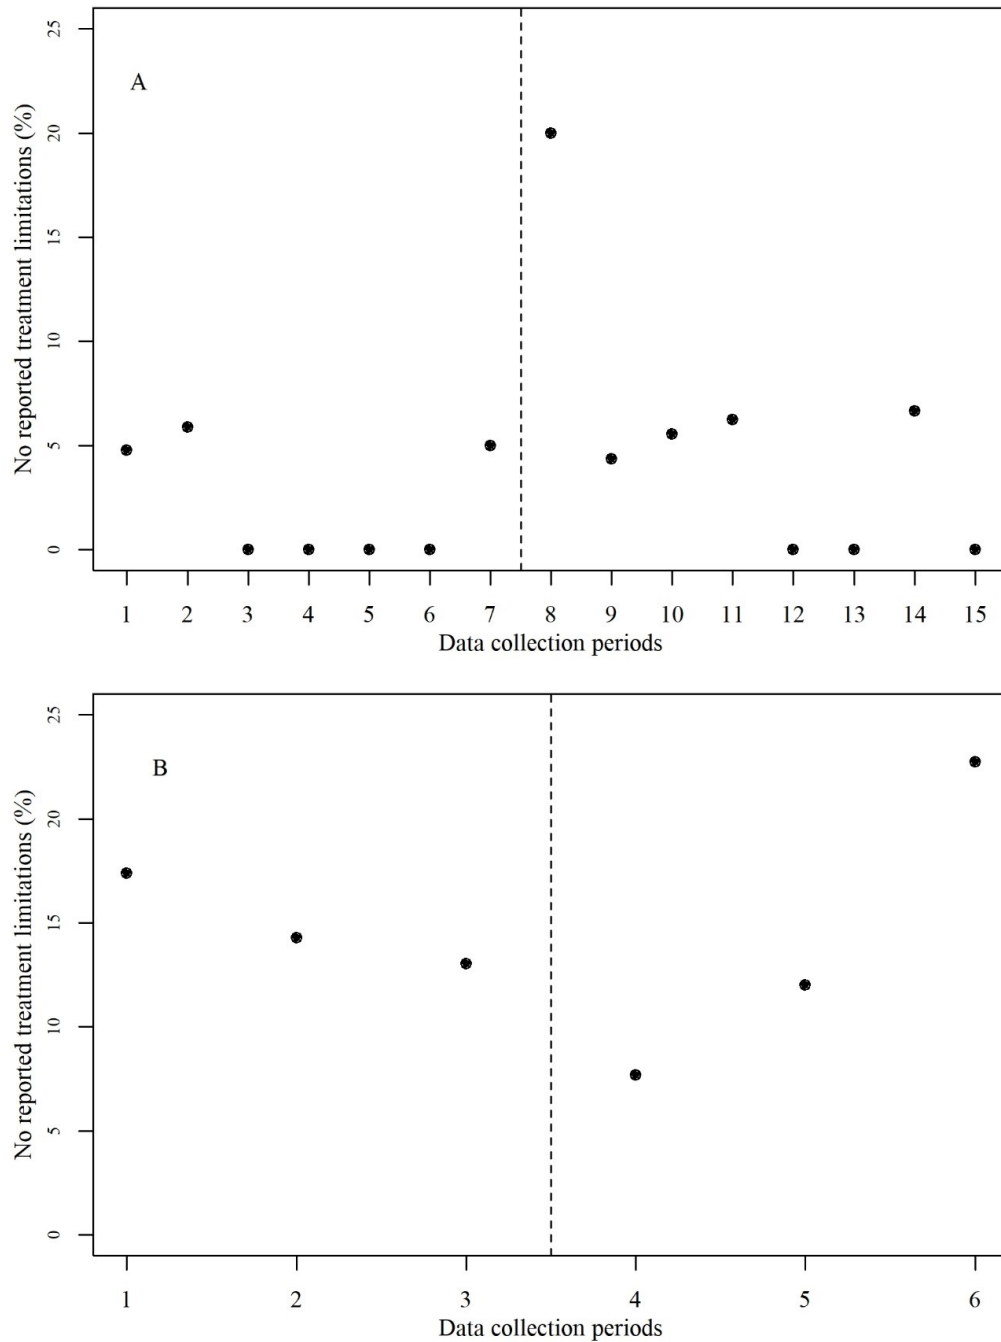

A=University hospital 1. B=University hospital 2.
