# Supplementary material for: Patient education materials to implement choosing wisely recommendations for internal medicine at the emergency department
Source: PubMed Central journal article supplement (PMC7871247; doi:10.1136/bmjoq-2020-000971), 2021-02-04
Supplement: bmjoq-2020-000971supp006.pdf [file bmjoq-2020-000971supp006.pdf]

**S1 Table. Adjusted analysis of Choosing Wisely recommendation 1.**

(1) Do not place an indwelling urinary catheter in non-critically ill patients who can void

| Variable                                                                   | Beta intervention* | Bivariable OR (95% CI) | P value | Multivariable OR (95% CI) | P value |
|----------------------------------------------------------------------------|--------------------|------------------------|---------|---------------------------|---------|
| Intervention*                                                              | 0.427              | 1.533 (0.346–6.794)    | 0.574   | 3.197 (0.322–31.794)      | 0.321   |
| Age                                                                        | 0.383              | 1.062 (0.988–1.140)    | 0.102   | 1.075 (0.987–1.170)       | 0.098   |
| Male Sex                                                                   | 0.561              | 1.724 (0.347–8.554)    | 0.505   | 2.478 (0.345–17.812)      | 0.367   |
| Hospital                                                                   | 0.902              | 0.223 (0.035–1.407)    | 0.110   | 0.101 (0.009–1.092)       | 0.059   |
| Specialism                                                                 | 0.286              | 1.192 (0.759–1.871)    | 0.445   | 1.254 (0.629–2.499)       | 0.520   |
| Charlson comorbidity index                                                 | 0.376              | 1.192 (0.256–5.560)    | 0.823   | 0.456 (0.052–3.962)       | 0.477   |
| High MEWS score                                                            | 0.451              | 0.689 (0.120–3.946)    | 0.675   |                           |         |
| Hospitalized 3 mo before ED visit                                          | 0.386              | 1.266 (0.280–5.733)    | 0.760   |                           |         |
| Outpatient care for internal medicine 1 year before presentation at the ED | 0.273              | 0.617 (0.293–7.934)    | 0.617   | 3.466 (0.325–37.011)      | 0.999   |
| Nursing home resident                                                      | 0.375              | NA                     | 0.999   |                           | 0.999   |
| Hospitalization                                                            | 0.470              | NA                     | 0.999   |                           | 0.999   |

Variables showing a difference of more than 10% in beta for baseline and intervention period were included in the multivariate logistic models to adjust for confounding.

\*Intervention is the difference between the baseline and intervention period.
