# Supplementary material for: Patient education materials to implement choosing wisely recommendations for internal medicine at the emergency department
Source: PubMed Central journal article supplement (PMC7871247; doi:10.1136/bmjoq-2020-000971), 2021-02-04
Supplement: bmjoq-2020-000971supp007.pdf [file bmjoq-2020-000971supp007.pdf]

**S2 Table. Adjusted analysis of Choosing Wisely recommendation 3.**

(3) Discuss whether treatment limitations are needed when talking to patients about treatment options

| <b>Variable</b>                                                            | <b>Beta intervention*</b> | <b>Bivariable OR (95% CI)</b> | <b>P value</b> | <b>Multivariable OR (95% CI)</b> | <b>P value</b> |
|----------------------------------------------------------------------------|---------------------------|-------------------------------|----------------|----------------------------------|----------------|
| Intervention*                                                              | 0.340                     | 1.405<br>(0.663–2.978)        | 0.374          | 1.431<br>(0.659–3.107)           | 0.365          |
| Age                                                                        | 0.354                     | 0.995<br>(0.975–1.015)        | 0.602          |                                  |                |
| Male Sex                                                                   | 0.333                     | 0.390<br>(0.182–0.835)        | 0.015          |                                  |                |
| Hospital                                                                   | 0.282                     | 3.967<br>(1.799–8.751)        | 0.001          | 4.610<br>(2.060–10.316)          | <0.001         |
| Specialism                                                                 | 0.336                     | 1.015<br>(0.789–1.306)        | 0.906          |                                  |                |
| Charlson comorbidity index                                                 | 0.347                     | 1.092<br>(0.509–2.343)        | 0.821          |                                  |                |
| High MEWS score                                                            | 0.326                     | 0.834<br>(0.240–2.891)        | 0.774          |                                  |                |
| Hospitalized 3 mo before ED visit                                          | 0.387                     | 0.390<br>(0.155–0.980)        | 0.045          | 0.308<br>(0.120–0.793)           | 0.015          |
| Outpatient care for internal medicine 1 year before presentation at the ED | 0.354                     | 0.424<br>(0.196–0.919)        | 0.030          |                                  |                |
| Nursing home resident                                                      | 0.341                     | 0.841<br>(0.107–6.638)        | 0.870          |                                  |                |
